# Supplementary material for: Au-modified Cu2O nanocubes for light-enhanced nitrate electroreduction to ammonia
Source: Royal Society of Chemistry journal article supplement (doi:10.1039/d4ta06439a), 2024-01-01
Supplement: d4ta06439a1.pdf [file d4ta06439a1.pdf]

## Supplementary Material

### **Au-modified Cu<sub>2</sub>O nanocubes for light-enhanced nitrate electroreduction to ammonia**

Yi-Ting Yang,<sup>a</sup> Xiao-Hui Wang,<sup>a</sup> Ze-Nong Zhang,<sup>a</sup> Xuan Ai,<sup>b</sup> Xue Xiao,<sup>b\*</sup> Yu

Chen,<sup>b\*</sup> and Shu-Ni Li<sup>a\*</sup>

<sup>a</sup> *Key Laboratory of Macromolecular Science of Shaanxi Province, School of Chemistry  
and Chemical Engineering, Shaanxi Normal University, Xi'an 710062, PR China.*

<sup>b</sup> *School of Materials Science and Engineering, Shaanxi Normal University, Xi'an  
710062, PR China.*

\*Corresponding authors

E-mail addresses: tiffanyxx110@gmail.com (X. Xiao), ndchenyu@gmail.com (Y.

Chen) and lishuni@snnu.edu.cn (S.-N. Li)

## **Reagents and chemicals**

Copper chloride dehydrate ( $\text{CuCl}_2 \cdot 2\text{H}_2\text{O}$ ), potassium nitrate ( $\text{KNO}_3$ , 99 %), sodium hydroxide ( $\text{NaOH}$ , 97 %), potassium sulfate ( $\text{K}_2\text{SO}_4$ ), L-ascorbic acid ( $\text{C}_6\text{H}_8\text{O}_6$ ), chloroauric acid ( $\text{HAuCl}_4$ ), sodium borohydride ( $\text{NaBH}_4$ ), and ethylene glycol ( $\text{C}_2\text{H}_6\text{O}_2$ ) are purchased from Aladdin Industrial Corporation (Shanghai, China).

## **Physical characterization**

The powder X-ray diffraction (XRD) patterns were acquired by an X-ray diffractometer (DX-2700) with  $\text{Cu K}\alpha$  radiation. Energy dispersive X-ray spectroscopy (EDX) was obtained at Quanta 200. The morphology and microstructures were analyzed by scanning electron microscopy (SEM, Tecnai G2 F20), transmission electron microscopy (TEM, TECNAI G2 F20). Electronic information was investigated by X-ray photoelectron spectroscopy (XPS, AXIS ULTRA), and the binding energy was calibrated with a C 1s peak of 284.6 eV as the standard value. UV-visible spectrometer (UV-vis) data were obtained at a Lambda 1050 spectrometer.  $^1\text{H}$  NMR spectra were measured by nuclear magnetic resonance (NMR) measurement (Bruker 400-MHz system).

## **Electrochemical measurements**

All electrochemical experiments were performed on an electrochemical workstation (CHI 660E) at 30 °C using different electrochemical testing techniques,

such as linear sweep voltammetry (LSV), cyclic voltammetry (CV), chronoamperometry (i-t) and electrochemical impedance spectroscopy (EIS). In the standard three-electrode system, the graphite electrode was used as the counter electrode, the saturated calomel electrode (SCE) was used as the reference electrode, and the glassy carbon electrode containing an electrocatalyst was used as the working electrode. All potentials in this work were calibrated using a reversible hydrogen electrode (RHE,  $E_{\text{RHE}} = E_{\text{SCE}} + 0.242 \text{ V} + 0.0591 \text{ pH}$ ). The electrocatalysts ink (2 mg mL<sup>-1</sup>) was formed by dispersing 2 mg of catalyst into 1 mL of mixed solvent (H<sub>2</sub>O + isopropanol, V<sub>1</sub>/V<sub>2</sub>= 8:2) and 10 μL Nafion solution (5 wt %). Then, 4 μL of electrocatalysts ink was dropped on the glassy carbon electrode (3 mm diameter) and dried at room temperature.

### **The Faradaic efficiency of NO<sub>3</sub><sup>-</sup>RR and NH<sub>3</sub> yield**

The Faraday efficiency of NO<sub>3</sub><sup>-</sup> to NH<sub>3</sub> could be calculated by the following formula:

$$FE_{\text{NH}_3} = (8 \times F \times c_{\text{NH}_3} \times V) / (17 \times Q)$$

The NH<sub>3</sub> yield could be calculated by the following formula:

$$\text{Yield}_{\text{NH}_3} = (c_{\text{NH}_3} \times V) / (m \times t)$$

The Faraday efficiency of NO<sub>2</sub><sup>-</sup> to NH<sub>3</sub> could be calculated by the following formula:

$$FE_{\text{NO}_2^-} = (2 \times F \times c_{\text{NO}_2^-} \times V)/(46 \times Q)$$

The  $\text{NO}_2^-$  yield could be calculated by the following formula:

$$\text{Yield}_{\text{NO}_2^-} = (c_{\text{NO}_2^-} \times V)/(m \times t)$$

$c_{\text{NH}_3}$  was the mass concentration of  $\text{NH}_3$  (aq),  $V$  was the volume of electrolyte in the cathode compartment (20 mL),  $t$  was the electrolytic time (3 h),  $F$  was the Faradaic constant ( $96485 \text{ C mol}^{-1}$ ),  $Q$  was the total charge passing the electrode,  $m$  and  $t$  were the electrocatalyst mass and the reduction reaction time, respectively.

### **Determination of $\text{NH}_3$ concentration**

The  $\text{NH}_3$  concentration was determined by the phenol-hypochlorite method. The standard curve was drawn as follows: Dry the solid of  $(\text{NH}_4)_2\text{SO}_4$  at  $120 \text{ }^\circ\text{C}$  for 2 h in advance. A series of standard ammonium sulfate solutions were prepared, and 0.4 mL phenol alcohol, 0.4 mL  $\text{Na}_2[\text{Fe}(\text{CN})_5\text{NO}]$  and 1 mL oxidizing agent were added to 10 mL standard solution of different concentrations successively. After mixing well, the solution was placed in the dark for 3 h. The absorption spectrum was measured by using a UV-vis spectrophotometer in the range of 500-800 nm.

After running the chronoamperometry test for 3 h, 1 mL electrolyte was diluted to 10 mL with water. The absorbance of the solution was measured by the same experimental method as the standard curve, and calculated the  $\text{NH}_4^+$ -N concentration ( $c_{\text{NH}_3}$ ) according to the UV-vis curve and the standard curve.

### **Determination of nitrite**

The concentration of  $\text{NO}_2^-$  was detected by the N-(1-naphthyl) ethylenediamine spectrophotometry method. Take 1.0 mL electrolyte in a 50 mL volumetric bottle, dilute it with a little deionized water, then add 1.0 mL p-aminobenzenesulfonamide and mix well. After leaving for 2-8 min, add 1.0 mL N-(1-naphthyl) ethylenediamine dihydrochloride and mix well. After 10 min, the absorbance was measured by a UV-vis spectrophotometer at 540 nm wavelength. The concentration-absorbance curve was made using a series of standard sodium nitrite solutions.

### **$^{15}\text{N}$ and $^{14}\text{N}$ isotope labeling experiments**

Isotope labeling experiments were performed to confirm the source of  $\text{NH}_4^+\text{-N}$  using  $\text{K}^{15}\text{NO}_3$  and  $\text{K}^{14}\text{NO}_3$  as the original nitrogen source, respectively.

## Figure section

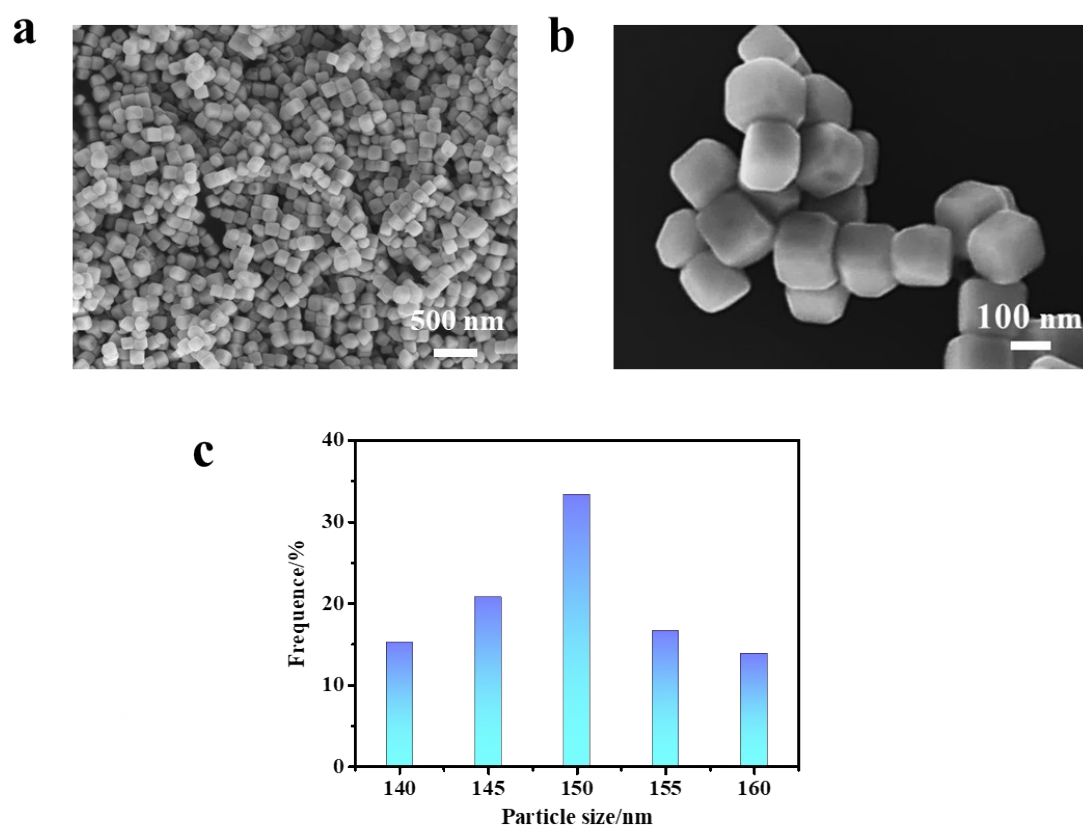

**Fig. S1.** (a-b) SEM images and (c) particle size distribution histograms of  $\text{Cu}_2\text{O}$  NCs.

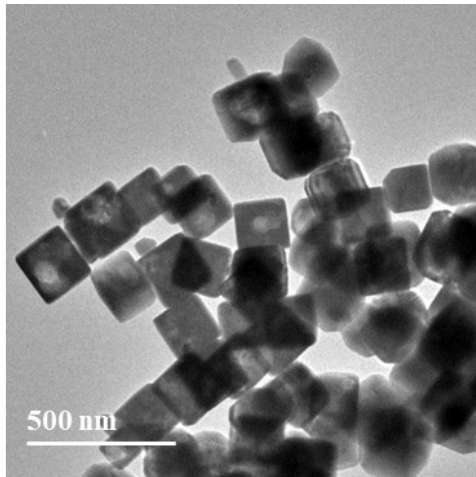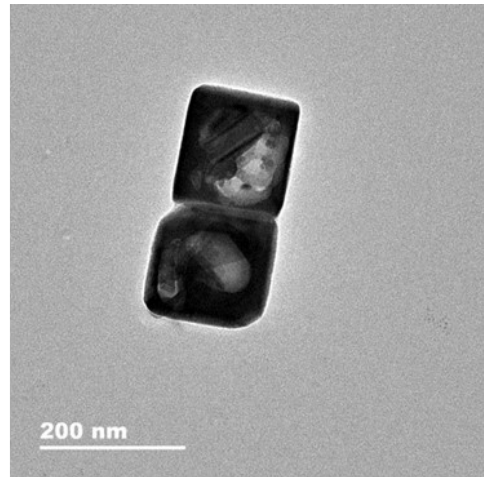

**Fig. S2.** TEM images of Cu<sub>2</sub>O NCs.

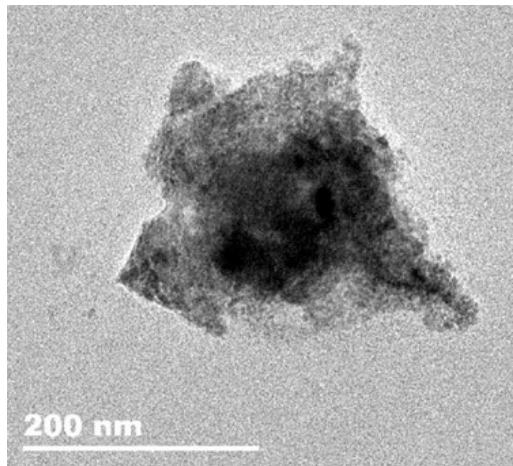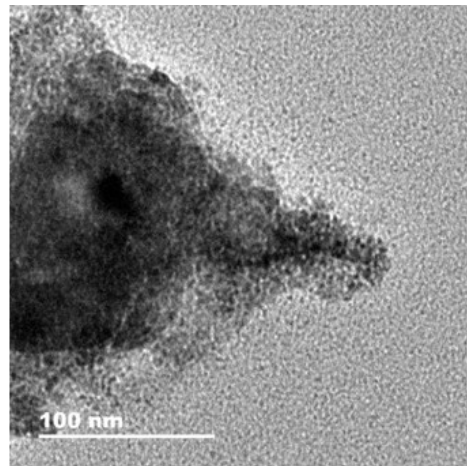

**Fig. S3.** TEM images of Au NPs.

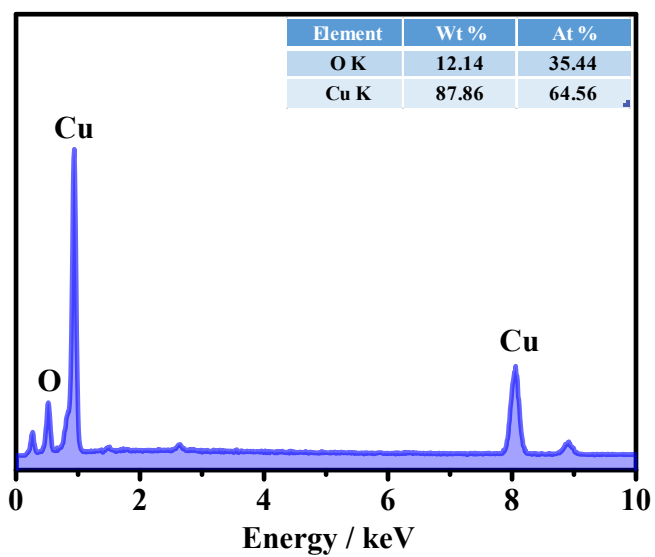

**Fig. S4.** EDX spectrum of  $\text{Cu}_2\text{O}$  NCs.

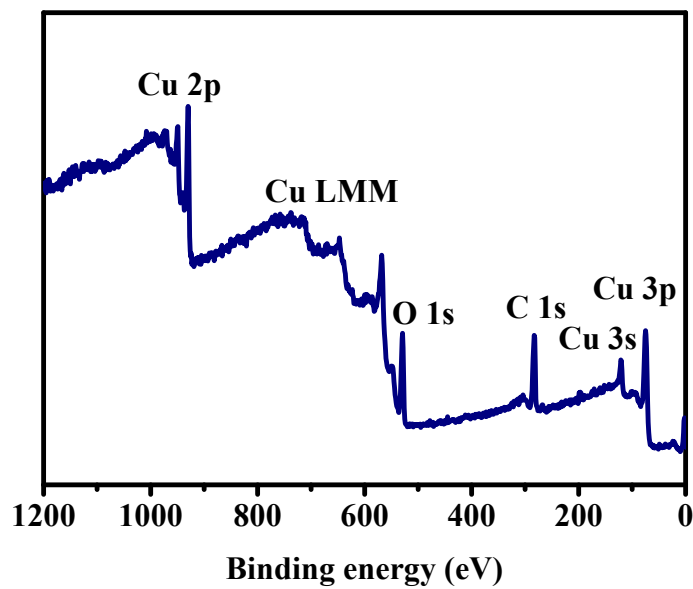

**Fig. S5.** Full XPS spectrum of  $\text{Cu}_2\text{O}$  NCs.



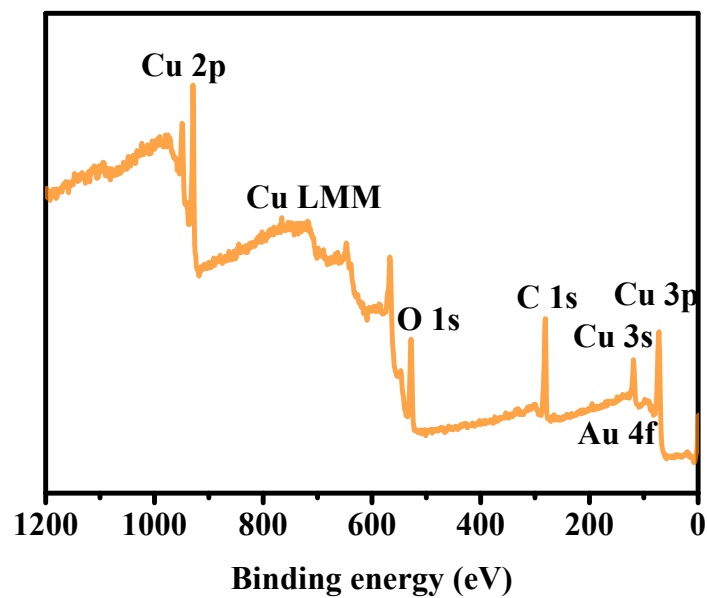

**Fig. S6.** Full XPS spectrum of Au/Cu<sub>2</sub>O NCs.

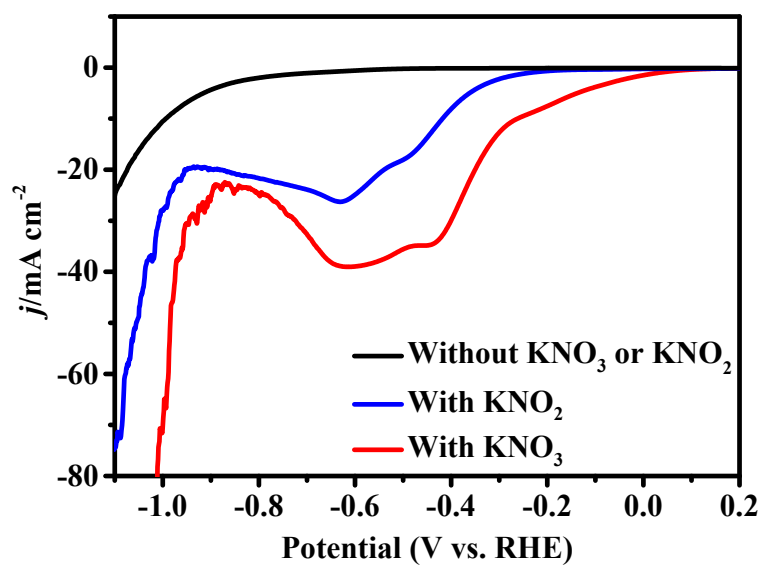

**Fig. S7.** LSV curves of Au/Cu<sub>2</sub>O NCs in 0.5 M K<sub>2</sub>SO<sub>4</sub> electrolyte with KNO<sub>3</sub> and KNO<sub>2</sub> at 10 mV s<sup>-1</sup>.

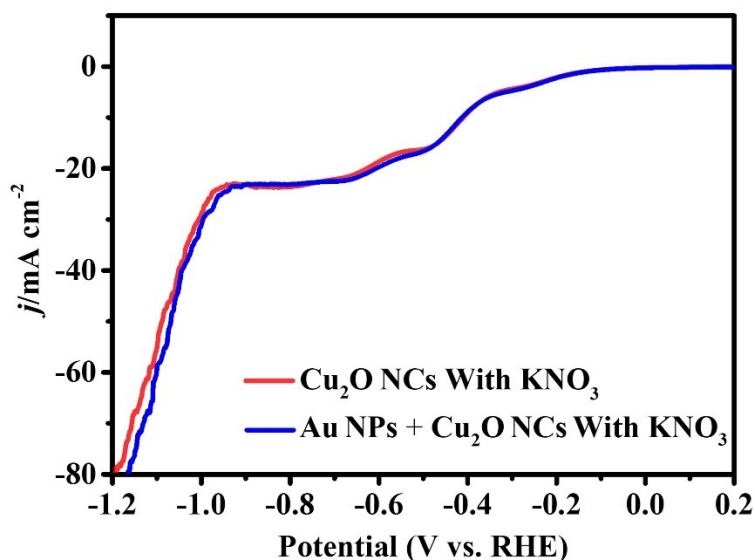

**Fig. S8** The LSV curves of Cu<sub>2</sub>O (red line) and Au NPs + Cu<sub>2</sub>O (blue line) for NO<sub>3</sub><sup>-</sup> RR.

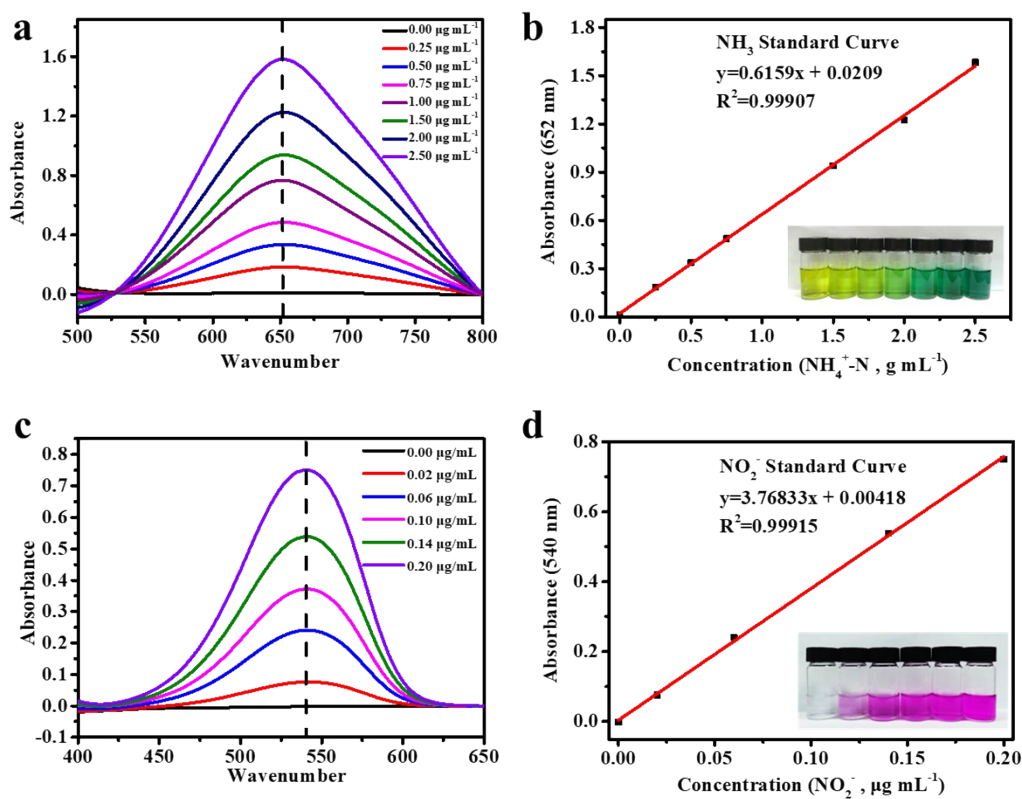

**Fig. S9.** (a) UV-vis adsorption curves and (b) calibration curves of NH<sub>4</sub><sup>+</sup>-N. (c) UV-vis adsorption curves and (d) calibration curves of NO<sub>2</sub><sup>-</sup>.

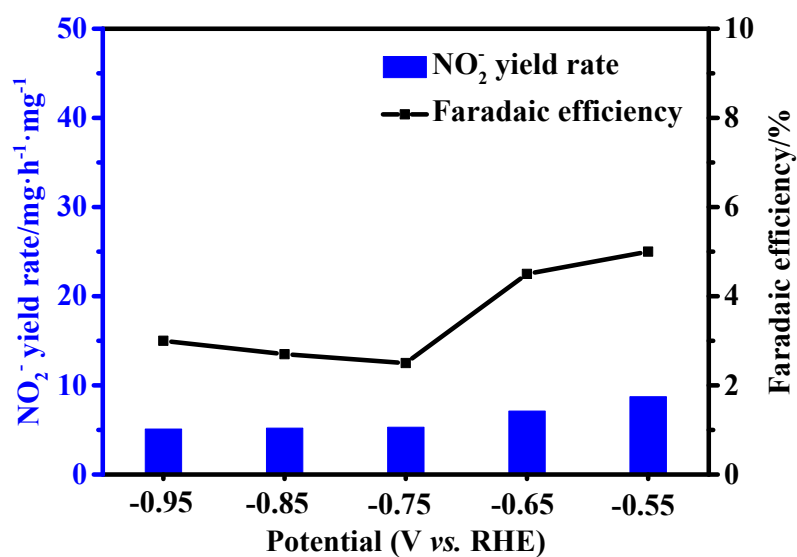

**Fig. S10.** The Faradaic efficiency and NO<sub>2</sub><sup>-</sup> yield on Au/Cu<sub>2</sub>O NCs at different potentials.

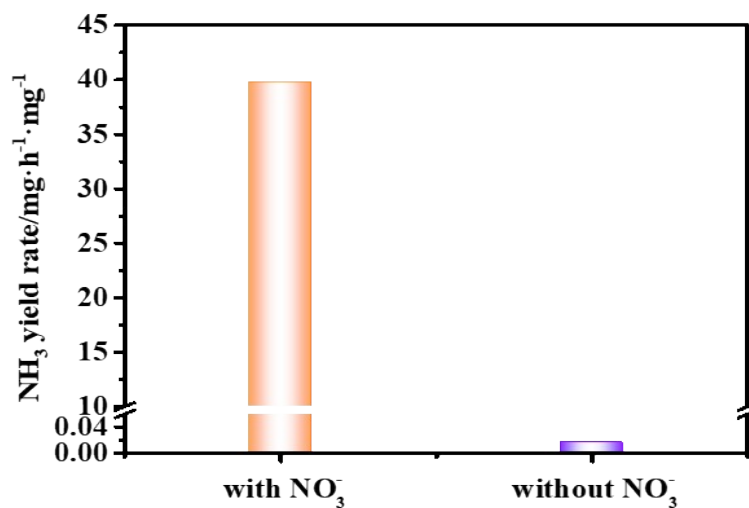

**Fig. S11.** The NH<sub>3</sub> yield on Au/Cu<sub>2</sub>O NCs in 0.5 M K<sub>2</sub>SO<sub>4</sub> electrolyte with and without NO<sub>3</sub><sup>-</sup>.

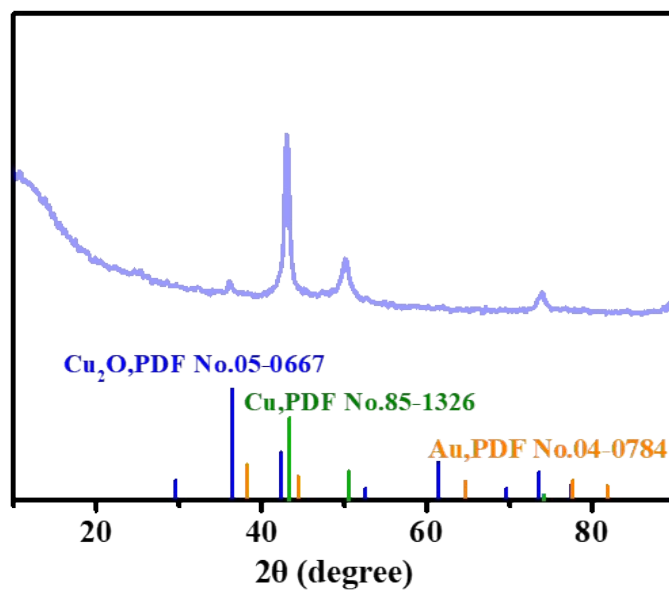

**Fig. S12.** XRD pattern of Au/Cu<sub>2</sub>O NCs after chronoamperometry test.

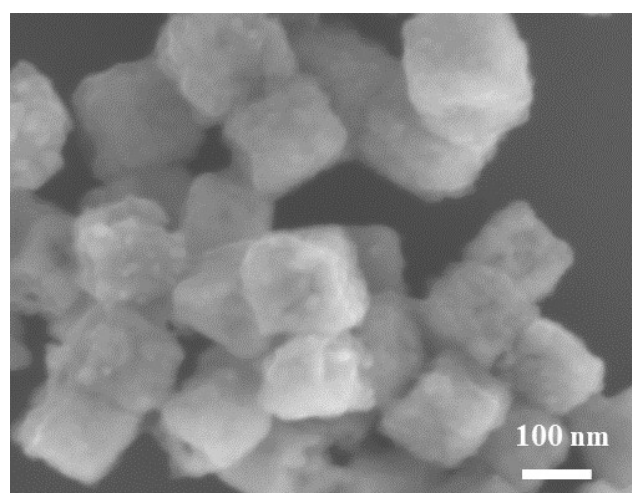

**Fig. S13.** SEM image of Au/Cu<sub>2</sub>O NCs after chronoamperometry test.

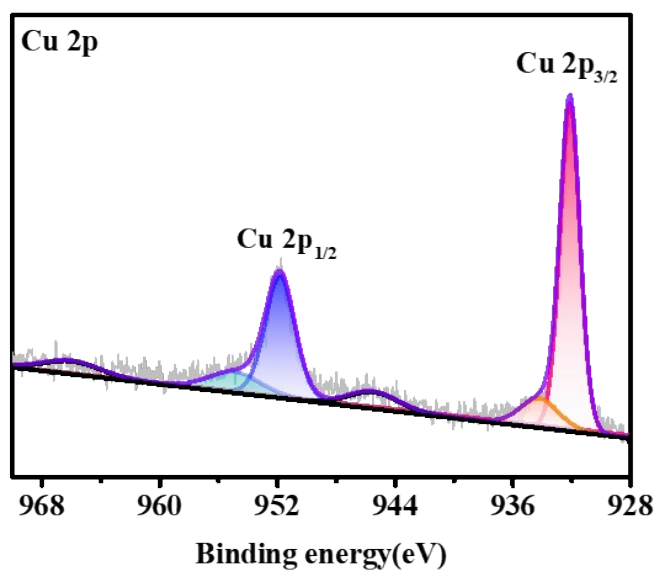

**Fig. S14.** Cu 2p XPS spectrum of Au/Cu<sub>2</sub>O NCs after chronoamperometry test.

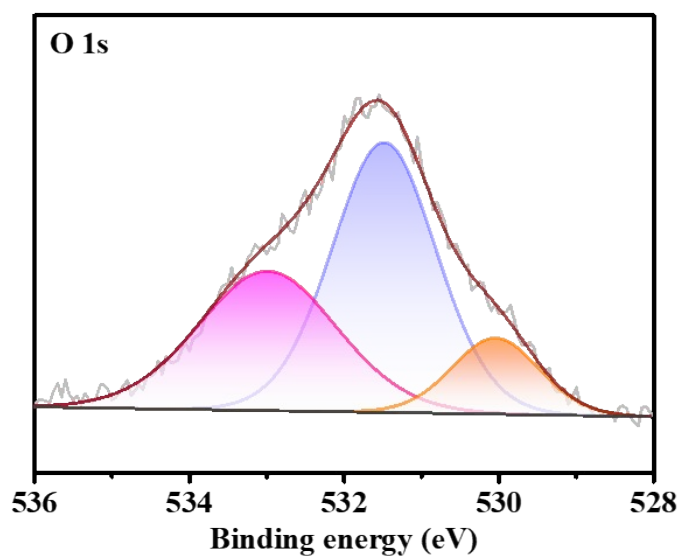

**Fig. S15.** O 1s XPS spectrum of Au/Cu<sub>2</sub>O NCs after chronoamperometry test.

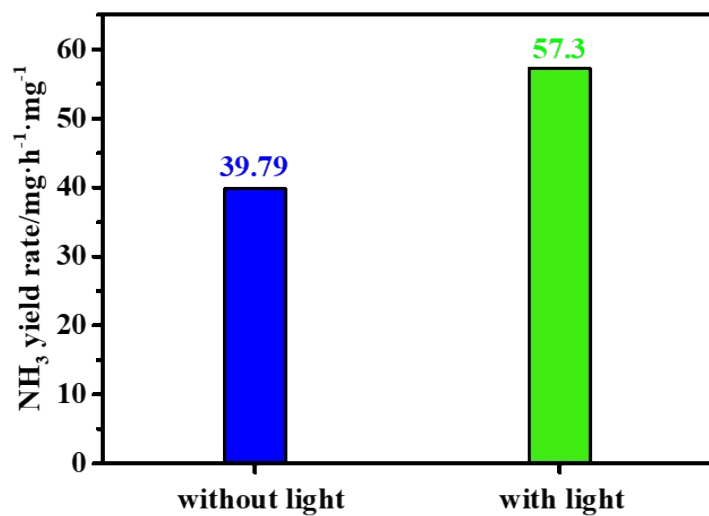

**Fig. S16.** NH<sub>3</sub> yield of Au/Cu<sub>2</sub>O NCs with/without light.

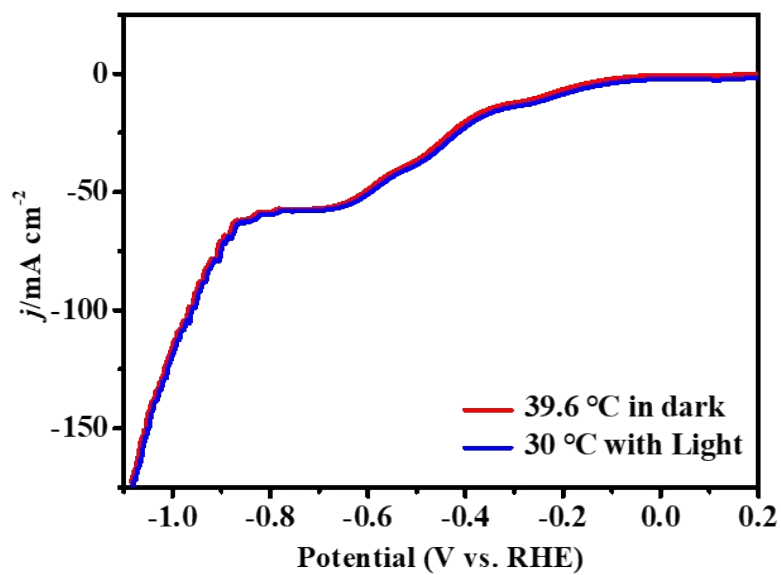

**Fig. S17.** LSV curves of Au/Cu<sub>2</sub>O NCs at 30 °C with light and 39.6 °C in dark.

**Table S1.** The comparison of NO<sub>3</sub><sup>-</sup>RR performance between Au/Cu<sub>2</sub>O NCs and some other reported electrocatalysts.

| Electrocatalysts                                                    | Electrolyte                                                        | NH <sub>3</sub> yield                                            | Faradaic Efficiency (%) | Ref. (year)        |
|---------------------------------------------------------------------|--------------------------------------------------------------------|------------------------------------------------------------------|-------------------------|--------------------|
| <b>Au/Cu<sub>2</sub>O NCs</b>                                       | <b>0.5 M K<sub>2</sub>SO<sub>4</sub><br/>50 mM KNO<sub>3</sub></b> | <b>39.79<br/>mg h<sup>-1</sup> mg<sub>cat</sub><sup>-1</sup></b> | <b>92.93</b>            | <b>This work</b>   |
| Co <sub>1</sub> -P co-doped graphitic carbon                        | 0.5 M Na <sub>2</sub> SO <sub>4</sub><br>0.1 M KNO <sub>3</sub>    | 8.6<br>mg h <sup>-1</sup> mg <sub>cat</sub> <sup>-1</sup>        | 93.8                    | 2024 <sup>1</sup>  |
| Cu <sub>x</sub> O/N-doped graphdiyne                                | 0.1 M KOH<br>0.1 M KNO <sub>3</sub>                                | 5.78<br>mg h <sup>-1</sup> mg <sub>cat</sub> <sup>-1</sup>       | 85                      | 2024 <sup>2</sup>  |
| Cu/Cu <sub>2</sub> O/Pi nanowires                                   | 1 M KOH<br>0.1 M KNO <sub>3</sub>                                  | 20.475<br>mg h <sup>-1</sup> mg <sub>cat</sub> <sup>-1</sup>     | 96.6                    | 2024 <sup>3</sup>  |
| Cu <sub>2</sub> O/Cu(OH) <sub>2</sub> heterostructure               | 0.1 M KOH<br>500 ppm KNO <sub>3</sub>                              | 1.63<br>mg h <sup>-1</sup> mg <sub>cat</sub> <sup>-1</sup>       | 76.95                   | 2024 <sup>4</sup>  |
| Au nanorod@Cu <sub>2</sub> O-Au nanoparticles                       | 0.5 M Na <sub>2</sub> SO <sub>4</sub><br>200 ppm KNO <sub>3</sub>  | 3.4<br>mg h <sup>-1</sup> mg <sub>cat</sub> <sup>-1</sup>        | 78.48                   | 2023 <sup>5</sup>  |
| Cu <sub>7</sub> Ni <sub>3</sub> ordered mesoporous carbon           | 0.1 M PBS<br>500 ppm KNO <sub>3</sub>                              | 0.237<br>mg h <sup>-1</sup> mg <sub>cat</sub> <sup>-1</sup>      | 78.9                    | 2023 <sup>6</sup>  |
| Cu nanosheets                                                       | 1 M KOH<br>0.2 M KNO <sub>3</sub>                                  | 10.57<br>mg h <sup>-1</sup> mg <sub>cat</sub> <sup>-1</sup>      | 88                      | 2023 <sup>7</sup>  |
| In-Pd bimetallic                                                    | 0.5 M Na <sub>2</sub> SO <sub>4</sub><br>0.1 M NaNO <sub>3</sub>   | 13.7<br>mg h <sup>-1</sup> mg <sub>cat</sub> <sup>-1</sup>       | 87.2                    | 2023 <sup>8</sup>  |
| Co <sub>3</sub> O <sub>4</sub> -nanosheets/Au-nanowires nanohybrids | 0.5 M K <sub>2</sub> SO <sub>4</sub><br>50 mM KNO <sub>3</sub>     | 2.66<br>mg h <sup>-1</sup> mg <sub>cat</sub> <sup>-1</sup>       | 97.76                   | 2023 <sup>9</sup>  |
| Au/Cu single atom alloys                                            | 0.5 M Na <sub>2</sub> SO <sub>4</sub><br>100 ppm NaNO <sub>3</sub> | 6.562<br>mg h <sup>-1</sup> mg <sub>cat</sub> <sup>-1</sup>      | 99.69                   | 2023 <sup>10</sup> |
| Cu-N-C single-atom catalyst                                         | 0.1 M KOH<br>0.1 M KNO <sub>3</sub>                                | 3.375<br>mg h <sup>-1</sup> mg <sub>cat</sub> <sup>-1</sup>      | 84.7                    | 2022 <sup>11</sup> |
| Pd-Cu <sub>2</sub> O corner-etched octahedra                        | 0.5 M K <sub>2</sub> SO <sub>4</sub><br>50 ppm KNO <sub>3</sub>    | 0.93<br>mg h <sup>-1</sup> mg <sub>cat</sub> <sup>-1</sup>       | 96.6                    | 2022 <sup>12</sup> |

|                                             |                                                                   |                                                            |       |                    |
|---------------------------------------------|-------------------------------------------------------------------|------------------------------------------------------------|-------|--------------------|
| Cu@Cu 2,3,6,7,10,11-hexahydroxytriphenylene | 0.5 M Na <sub>2</sub> SO <sub>4</sub><br>500 ppm KNO <sub>3</sub> | 3.68<br>mg h <sup>-1</sup> mg <sub>cat</sub> <sup>-1</sup> | 67.55 | 2022 <sup>13</sup> |
| Fe single atom/C                            | 0.1 M K <sub>2</sub> SO <sub>4</sub><br>0.5 M KNO <sub>3</sub>    | 20<br>mg h <sup>-1</sup> mg <sub>cat</sub> <sup>-1</sup>   | 75    | 2021 <sup>14</sup> |



## References

1. Ni, J.; Yan, J.; Li, F.; Qi, H.; Xu, Q.; Su, C.; Sun, L.; Sun, H.; Ding, J.; Liu, B., Atomic Co-P catalytic pair drives efficient electrochemical nitrate reduction to ammonia. *Adv. Energy Mater.*, 2024, **14**, 2400065.
2. Li, J.; Valenza, R.; Haussener, S., In situ synthesis of  $\text{Cu}_x\text{O}/\text{N}$  doped graphdiyne with pyridine N configuration for ammonia production via nitrate reduction. *Small*, 2024, **20**, 2310467.
3. Luo, W.; Guo, Z.; Ye, L.; Wu, S.; Jiang, Y.; Xu, P.; Wang, H.; Qian, J.; Zhou, X.; Tang, H.; et al., Electrical-driven directed-evolution of copper nanowires catalysts for efficient nitrate reduction to ammonia. *Small*, 2024, **20**, 2311336.
4. Geng, J.; Ji, S., Boosting electrocatalytic nitrate reduction to ammonia via  $\text{Cu}_2\text{O}/\text{Cu}(\text{OH})_2$  heterostructures promoting electron transfer. *Nano Res.*, 2024, **17**, 4898-4907.
5. Yu, X.; Du, S.; Xu, Z.; He, J.; Liu, F.; Wang, B.; Sun, S.; Tang, Y.; Zhao, K., Surface-enhanced bimetallic effect of Au-Pd by internal electromagnetic fields from  $\text{Au}@\text{Cu}_2\text{O}$  for efficient electrochemical nitrate reduction to ammonia. *Chem. Eng. J.*, 2023, **480**, 148152.
6. Zhao, J.; Liu, L.; Yang, Y.; Liu, D.; Peng, X.; Liang, S.; Jiang, L., Insights into electrocatalytic nitrate reduction to ammonia via Cu-based bimetallic catalysts. *ACS Sustainable Chem. Eng.*, 2023, **11**, 2468-2475.
7. Fu, Y.; Wang, S.; Wang, Y.; Wei, P.; Shao, J.; Liu, T.; Wang, G.; Bao, X., Enhancing electrochemical nitrate reduction to ammonia over Cu nanosheets via facet tandem catalysis. *Angew. Chem. Int. Ed.*, 2023, **62**, e202303327.

8. Xie, M.; Tang, S.; Li, Z.; Wang, M.; Jin, Z.; Li, P.; Zhan, X.; Zhou, H.; Yu, G., Intermetallic single-atom alloy In-Pd bimetallic for neutral electrosynthesis of ammonia from nitrate. *J. Am. Chem. Soc.*, 2023, **145**, 13957-13967.
9. Zhang, Z. N.; Hong, Q. L.; Wang, X. H.; Huang, H.; Li, S. N.; Chen, Y., Au nanowires decorated ultrathin  $\text{Co}_3\text{O}_4$  nanosheets toward light-enhanced nitrate electroreduction. *Small*, 2023, **19**, 2300530.
10. Yin, H.; Peng, Y.; Li, J., Electrocatalytic reduction of nitrate to ammonia via a Au/Cu single atom alloy catalyst. *Environ. Sci. Technol.*, 2023, **57**, 3134-3144.
11. Yang, J.; Qi, H.; Li, A.; Liu, X.; Yang, X.; Zhang, S.; Zhao, Q.; Jiang, Q.; Su, Y.; Zhang, L.; et al., Potential-driven restructuring of Cu single atoms to nanoparticles for boosting the electrochemical reduction of nitrate to ammonia. *J. Am. Chem. Soc.*, 2022, **144**, 12062-12071.
12. Xu, Y.; Ren, K.; Ren, T.; Wang, M.; Wang, Z.; Li, X.; Wang, L.; Wang, H., Ultralow-content Pd in-situ incorporation mediated hierarchical defects in corner-etched  $\text{Cu}_2\text{O}$  octahedra for enhanced electrocatalytic nitrate reduction to ammonia. *Appl. Catal., B*, 2022, **306**, 121094.
13. Zhu, X.; Huang, H.; Zhang, H.; Zhang, Y.; Shi, P.; Qu, K.; Cheng, S.-B.; Wang, A.-L.; Lu, Q., Filling mesopores of conductive metal-organic frameworks with Cu clusters for selective nitrate reduction to ammonia. *ACS Appl. Mater. Interfaces*, 2022, **14**, 32176-32182.
14. Wu, Z.-Y.; Karamad, M.; Yong, X.; Huang, Q.; Cullen, D. A.; Zhu, P.; Xia, C.; Xiao, Q.; Shakouri, M.; Chen, F.-Y.; et al., Electrochemical ammonia synthesis via nitrate reduction on Fe single atom catalyst. *Nat. Commun.*, 2021, **12**, 2870.
